# Supplementary material
Source: HighWire-hosted journal article supplement (https://erj.ersjournals.com/content/55/6/2001148)
Supplement: inline-supplementary-material-1 [file inline-supplementary-material-1.pdf]

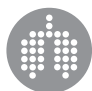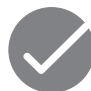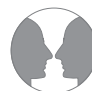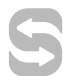

SHAREABLE PDF

# Arterial hypertension and the risk of severity and mortality of COVID-19

Carlos Enrique Leiva Sisnieguez , Walter Gastón Espeche and Martín Rogelio Salazar

**Affiliation:** Faculty of Medical Sciences, National University of La Plata, Buenos Aires, Argentina, and Argentinian Society of Arterial Hypertension (SAHA).

**Correspondence:** Carlos Enrique Leiva Sisnieguez, National University of La Plata, Medical Sciences Faculty, 71 y 115 Pabellón Académico, La Plata, Buenos Aires 1900, Argentina. E-mail: cleiva@med.unlp.edu.ar

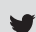

@ERSpublications

**Arterial hypertension implies the risk of a hard COVID-19 outcome. This may be explained by potential confounding factors, such as age and cardiovascular disease.** <https://bit.ly/2Kr6Ax4>

**Cite this article as:** Leiva Sisnieguez CE, Espeche WG, Salazar MR, *et al.* Arterial hypertension and the risk of severity and mortality of COVID-19. *Eur Respir J* 2020; 55: 2001148 [<https://doi.org/10.1183/13993003.01148-2020>].

This single-page version can be shared freely online.

*To the Editor:*

We read with great interest the recently published study by GUAN *et al.* [1]. To the best of our knowledge this is the first large-scale study that focuses on independent clinical risk factors associated with a composite outcome (death, use of a ventilator, or intensive care unit (ICU) requirement), using a Cox regression model.
